# Supplementary material for: Enzymatic Synthesis of Glucose-Based Fatty Acid Esters in Bisolvent Systems Containing Ionic Liquids or Deep Eutectic Solvents
Source: MDPI journal article supplement (doi:10.3390/molecules21101294), 2016-09-27
Supplement: s1 [file s1]

# Supplementary Materials: Enzymatic Synthesis of Glucose-Based Fatty Acid Esters in Bisolvent Systems Containing Ionic Liquids or Deep Eutectic Solvents

Kai-Hua Zhao, Yu-Zheng Cai, Xiao-Sheng Lin, Jun Xiong, Peter J. Halling and Zhen Yang

| Std | Run | A:enzyme amount (mg) | B: VL/Glc molar ratio | C: time (h) | D:2M2B/IL v/v ratio | Conversion (%) |
|-----|-----|----------------------|-----------------------|-------------|---------------------|----------------|
| 1   | 1   | 5                    | 0.5                   | 22          | 2.5                 | 46.428501      |
| 16  | 2   | 20                   | 1.5                   | 26          | 2.5                 | 70.7021043     |
| 18  | 3   | 35                   | 1                     | 18          | 2.5                 | 68.8598515     |
| 27  | 4   | 20                   | 1                     | 22          | 2.5                 | 64.3616164     |
| 30  | 5   | 20                   | 1                     | 22          | 2.5                 | 62.2728627     |
| 13  | 6   | 20                   | 0.5                   | 18          | 2.5                 | 42.0293115     |
| 5   | 7   | 20                   | 1                     | 18          | 1                   | 44.3057805     |
| 7   | 8   | 20                   | 1                     | 18          | 4                   | 56.2489272     |
| 11  | 9   | 5                    | 1                     | 22          | 4                   | 22.7574848     |
| 10  | 10  | 35                   | 1                     | 22          | 1                   | 71.3492678     |
| 2   | 11  | 35                   | 0.5                   | 22          | 2.5                 | 55.9538965     |
| 8   | 12  | 20                   | 1                     | 26          | 4                   | 66.6535857     |
| 3   | 13  | 5                    | 1.5                   | 22          | 2.5                 | 21.7219426     |
| 17  | 14  | 5                    | 1                     | 18          | 2.5                 | 14.523895      |
| 23  | 15  | 20                   | 0.5                   | 22          | 4                   | 50.4500922     |
| 6   | 16  | 20                   | 1                     | 26          | 1                   | 49.6690181     |
| 24  | 17  | 20                   | 1.5                   | 22          | 4                   | 69.191572      |
| 9   | 18  | 5                    | 1                     | 22          | 1                   | 18.7829106     |
| 21  | 19  | 20                   | 0.5                   | 22          | 1                   | 41.5719408     |
| 26  | 20  | 20                   | 1                     | 22          | 2.5                 | 65.169174      |
| 25  | 21  | 20                   | 1                     | 22          | 2.5                 | 64.174174      |
| 14  | 22  | 20                   | 1.5                   | 18          | 2.5                 | 55.5410012     |
| 12  | 23  | 35                   | 1                     | 22          | 4                   | 87.7568039     |
| 19  | 24  | 5                    | 1                     | 26          | 2.5                 | 22.7333814     |
| 4   | 25  | 35                   | 1.5                   | 22          | 2.5                 | 97.9392        |
| 28  | 26  | 20                   | 1                     | 22          | 2.5                 | 66.9967629     |
| 22  | 27  | 20                   | 1.5                   | 22          | 1                   | 60.1277733     |
| 20  | 28  | 35                   | 1                     | 26          | 2.5                 | 98.8052172     |
| 29  | 29  | 20                   | 1                     | 22          | 2.5                 | 75.5565667     |
| 15  | 30  | 20                   | 0.5                   | 26          | 2.5                 | 52.7394192     |

Figure S1. Response Surface Methodology (RSM) Experimental Design Data.
